# Supplementary material for: Novel Three-Dimensional Body Scan Anthropometry versus MR-Pelvimetry for Vaginal Breech Delivery Assessment
Source: MDPI journal article supplement (doi:10.3390/jcm12196181), 2023-09-25
Supplement: s1 [file s1]

## Supplement 1

|                                                                                     |  |                                                          |
|-------------------------------------------------------------------------------------|--|----------------------------------------------------------|
| 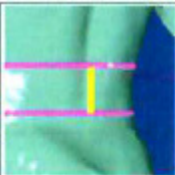   |  | <a href="#">5070</a><br>Waist to high hip back           |
|    |  | <a href="#">5075</a><br>Distance waistband-high hip back |
|    |  | <a href="#">5080</a><br>Waist to buttock                 |
|    |  | <a href="#">5085</a><br>Distance waistband - buttock     |
|   |  | <a href="#">6012</a><br>Crotch length, rear              |
|  |  | <a href="#">6015</a><br>Crotch length at waistband       |
|  |  | <a href="#">6510</a><br>Waist girth                      |
|  |  | <a href="#">6512</a><br>Middle Hip                       |
|  |  | <a href="#">6520</a><br>Waist band                       |
|  |  | <a href="#">7011</a><br>Waist to buttock height right    |

|                                                                                     |  |                                                           |
|-------------------------------------------------------------------------------------|--|-----------------------------------------------------------|
| 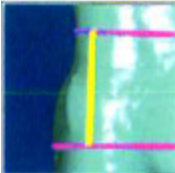   |  | <a href="#">7016</a><br>Waistband to buttock height right |
|    |  | <a href="#">7021</a><br>Waist to hip/thigh right          |
|    |  | <a href="#">7510</a><br>High hip girth                    |
|    |  | <a href="#">7520</a><br>Buttock girth                     |
|   |  | <a href="#">7525</a><br>Hip girth                         |
|  |  | <a href="#">7540</a><br>Belly circumference               |
|  |  | <a href="#">7545</a><br>Maximum belly circumference       |

**Table S1. Catalog of the body scanner values used in the study.**

The table shows all 17 automatically generated 3D body scanner values, used in the study. The yellow lines show the measurement planes, the purple lines show important orientation planes or boundary points when measuring distances.

| Variables                                       | N  | mean   | SD    | 95% CI            | min    | max    |
|-------------------------------------------------|----|--------|-------|-------------------|--------|--------|
| gestational age at pelvimetry [weeks]           | 72 | 36.5   | 0.6   | 36.42 ; 36.68     | 35.5   | 39.5   |
| BMI [kg/m <sup>2</sup> ] before pregnancy       | 73 | 22.9   | 3.3   | 22.10 ; 23.63     | 18.9   | 31.7   |
| BMI [kg/m <sup>2</sup> ] at diagnostics         | 67 | 27.9   | 3.6   | 27.00 ; 28.75     | 21.9   | 38.6   |
| BMI gain [kg/m <sup>2</sup> ]                   | 67 | 4.9    | 1.7   | 4.48 ; 5.29       | 0.0    | 8.2    |
| <b>MRI Pelvimetry</b>                           |    |        |       |                   |        |        |
| obstetrical conjugate [cm]                      | 72 | 12.8   | 0.9   | 12.56 ; 12.99     | 10.6   | 14.8   |
| pelvic width [cm]                               | 72 | 13.5   | 1.0   | 13.29 ; 13.76     | 11.2   | 15.9   |
| pelvic constriction [cm]                        | 72 | 11.7   | 1.0   | 11.49 ; 11.96     | 9.3    | 14.0   |
| sacral pelvic outlet diameter [cm]              | 72 | 13.3   | 0.9   | 13.05 ; 13.49     | 11.1   | 15.3   |
| coccygeal-pelvic outlet [cm]                    | 72 | 8.7    | 1.0   | 8.47 ; 8.93       | 5.0    | 10.8   |
| interspinous distance [cm]                      | 72 | 11.1   | 0.9   | 11.31 ; 11.10     | 8.6    | 13.1   |
| intertuberous distance [cm]                     | 72 | 14.1   | 1.3   | 13.83 ; 14.45     | 10.3   | 16.9   |
| <b>Pelvimeter</b>                               |    |        |       |                   |        |        |
| external conjugate [cm]                         | 72 | 23.5   | 2.1   | 23.01 ; 24.01     | 19.0   | 29.0   |
| distantia spinarum [cm]                         | 72 | 24.1   | 1.8   | 23.65 ; 24.48     | 19.5   | 27.0   |
| distantia intercristarum [cm]                   | 72 | 27.8   | 1.9   | 27.34 ; 28.24     | 24.0   | 36.0   |
| distantia trochanterica [cm]                    | 71 | 33.3   | 2.3   | 32.79 ; 33.88     | 27.0   | 39.0   |
| <b>3D bodyscan</b>                              |    |        |       |                   |        |        |
| waist to high hip back (5070) [cm]              | 65 | 7.4    | 1.4   | 7.00 ; 7.72       | 3.7    | 10.5   |
| distance waistband to high hip back (5075) [cm] | 65 | 4.1    | 2.3   | 3.50 ; 4.62       | 0.1    | 8.5    |
| waist to buttock (5080) [cm]                    | 65 | 21.3   | 1.5   | 20.94 ; 21.70     | 17.8   | 24.8   |
| distance waistband to buttock (5085) [cm]       | 65 | 17.2   | 2.4   | 16.56 ; 17.76     | 12.3   | 21.8   |
| scrotch length, rear (6012) [cm]                | 65 | 42.7   | 2.6   | 42.06 ; 43.38     | 36.3   | 49.0   |
| scotch length at waistband (6015) [cm]          | 65 | 70.6   | 9.8   | 68.17 ; 73.03     | 54.2   | 92.4   |
| waist girth (6510) [cm]                         | 65 | 100.9  | 7.5   | 99.03 ; 102.76    | 85.9   | 118.4  |
| middle hip (6512) [cm]                          | 65 | 112.3  | 8.8   | 110.08 ; 114.45   | 95.9   | 135.6  |
| waist band (6520) [cm]                          | 65 | 104.7  | 7.4   | 102.91 ; 106.58   | 89.4   | 122.7  |
| waist to buttock high right (7011) [cm]         | 65 | 20.9   | 1.6   | 20.48 ; 21.26     | 17.4   | 24.5   |
| waistband to buttock high right (7016) [cm]     | 65 | 14.9   | 3.2   | 14.08 ; 15.66     | 8.7    | 19.9   |
| waist to hip right (7021) [cm]                  | 65 | 35.5   | 2.0   | 35.05 ; 36.56     | 30.8   | 40.4   |
| high hip girth (7510) [cm]                      | 65 | 110.8  | 8.2   | 108.75 ; 112.80   | 94.2   | 134.3  |
| buttock girth (7520) [cm]                       | 65 | 109.8  | 9.2   | 107.54 ; 112.12   | 92.1   | 134.2  |
| hip girth (7525) [cm]                           | 65 | 110.9  | 9.3   | 108.56 ; 113.18   | 92.4   | 134.7  |
| belly circumference (7540) [cm]                 | 65 | 109.1  | 7.8   | 107.21 ; 111.08   | 93.3   | 131.7  |
| maximum belly circumference (7545) [cm]         | 65 | 110.2  | 8.0   | 108.17 ; 112.14   | 93.7   | 133.4  |
| external conjugate [cm]                         | 68 | 29.5   | 2.4   | 28.92 ; 30.07     | 24.7   | 36.2   |
| distantia spinarum [cm]                         | 68 | 27.2   | 2.2   | 26.64 ; 27.71     | 22.2   | 32.4   |
| distantia intercristarum [cm]                   | 68 | 34.1   | 2.7   | 33.46 ; 34.78     | 29.4   | 43.6   |
| distantia trochanterica [cm]                    | 68 | 39.0   | 3.4   | 38.21 ; 39.88     | 32.0   | 46.2   |
| distance crista to trochanter (right) [cm]      | 68 | 19.1   | 3.8   | 18.15 ; 19.99     | 11.5   | 28.5   |
| <b>delivery</b>                                 |    |        |       |                   |        |        |
| gestational age at delivery [weeks]             | 70 | 39.4   | 1.0   | 39.25 ; 39.63     | 37.2   | 41.4   |
| birth weight [g]                                | 71 | 3323.2 | 340.3 | 3242.67 ; 3403.78 | 2690.0 | 4460.0 |
| pH value                                        | 71 | 7.23   | 0.09  | 7.21 ; 7.25       | 6.95   | 7.39   |
| APGAR score 5 minutes                           | 71 | 9.3    | 0.9   | 9.07 ; 9.49       | 6.0    | 10.0   |

**Table S2: Characteristics of the overall study population (N=73), including delivery from vertex position as well as primary cesarean section.**

The numbers in brackets behind the body scanner values correspond to the description from the measurement value catalog (Supplement 1).

*N*, number; *BMI*, Body-Mass-Index; *SD*, standard deviation; *95% CI*, 95%-confidence interval; *min*, minimum; *max*, maximum; *5' APGAR-value*, Appearance-Pulse-Grimace-Activity-Respiration value 5minutes after delivery
